# Supplementary material for: In situ Sn isotope analysis of cassiterite (SnO2) by nanosecond laser ablation MC-ICP-MS
Source: Royal Society of Chemistry journal article supplement (doi:10.1039/d3ja00010a), 2023-01-01
Supplement: d3ja00010a1.pdf [file d3ja00010a1.pdf]

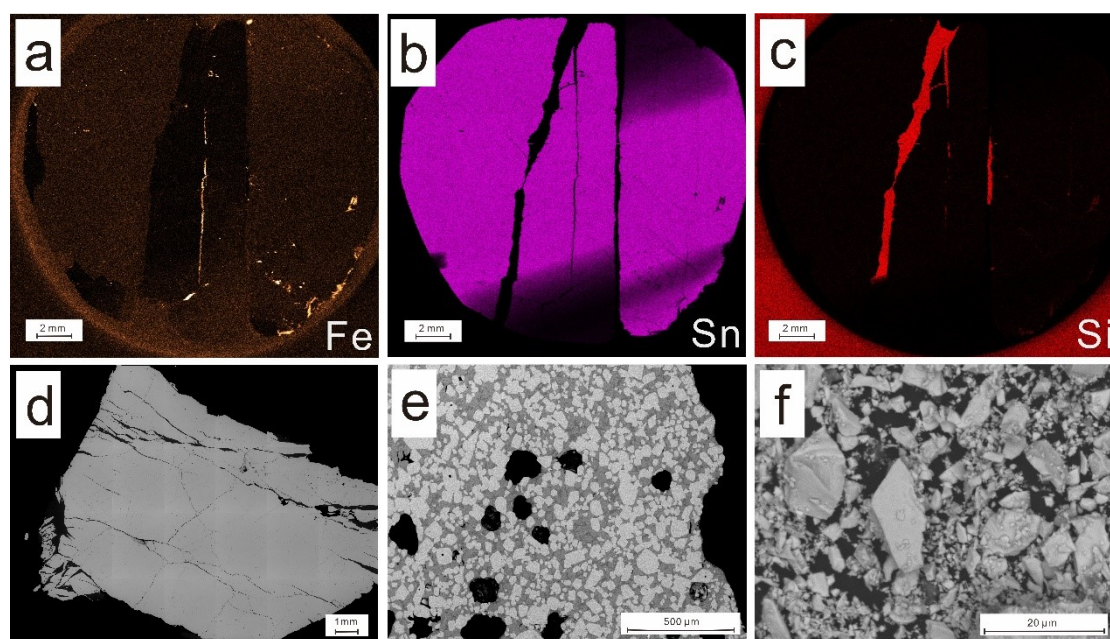

**Fig. S1.** Representative micro XRF maps (a-c), backscatter electron images (d-f) of cassiterite samples. a-c reveals the distribution of various elements of #cas 2 with a crack. d is the homogeneous cassiterite #cas 17. e represents the synthetic cassiterite. f shows the particle size of crushed cassiterite grains.

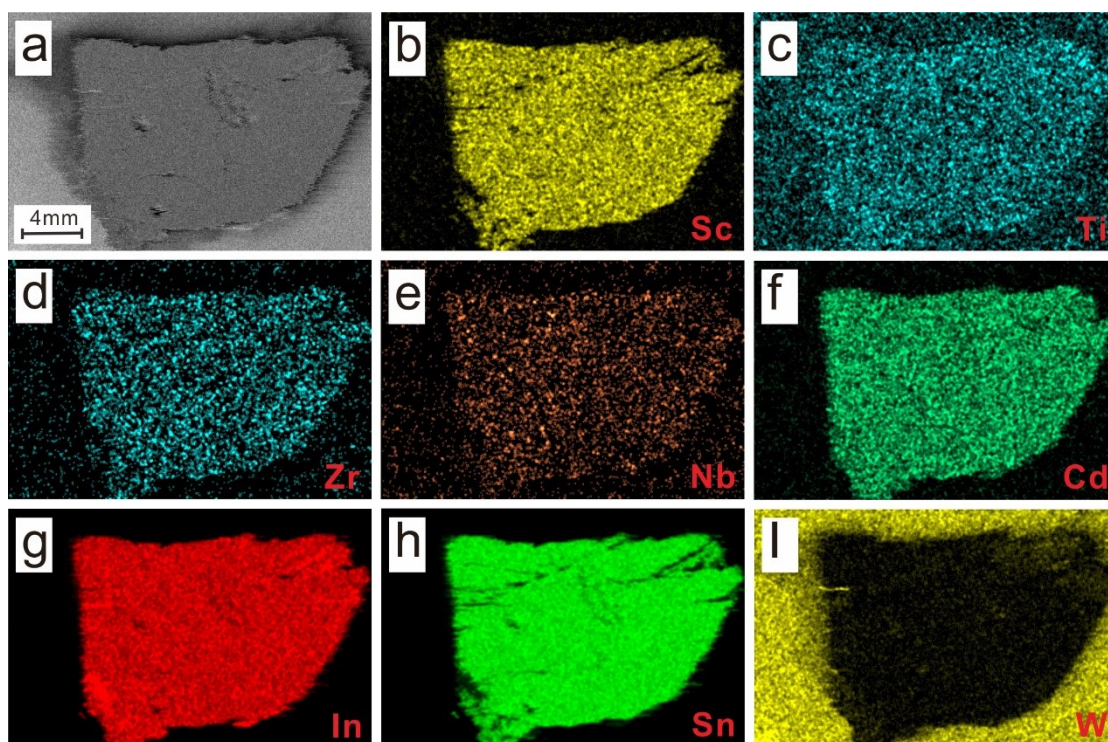

**Fig. S2.** Representative micro XRF maps of the homogeneous solid standard #cas 17. A represents the overlay of all elements.

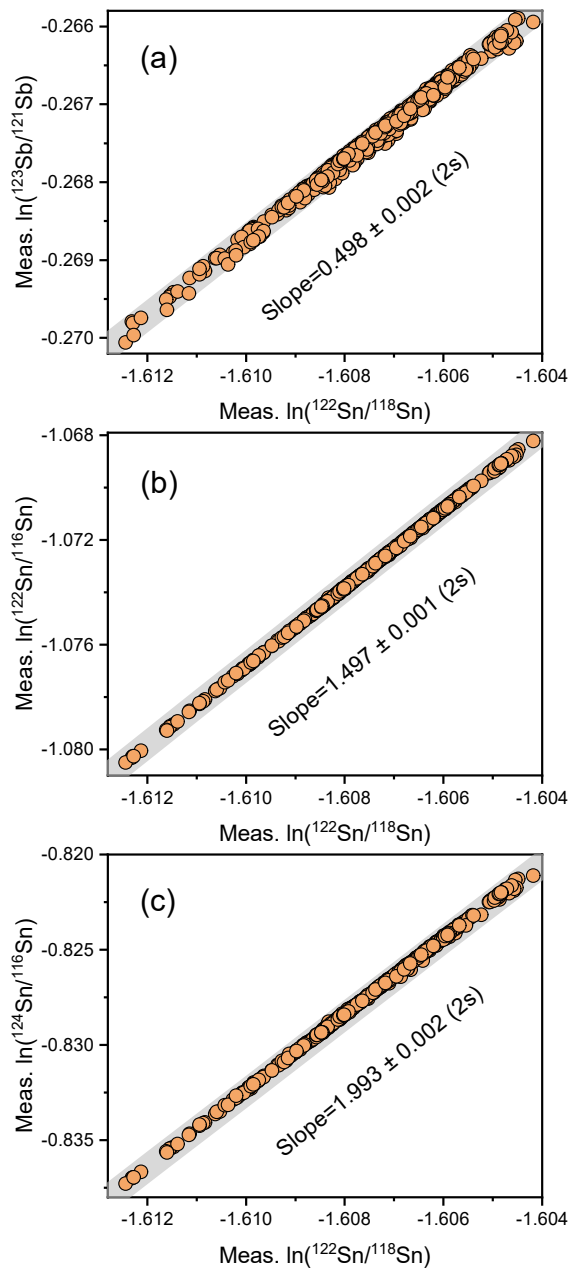

**Fig. S3.** Logarithmic plots of raw ratio  $^{123}\text{Sb}/^{121}\text{Sb}$ ,  $^{122}\text{Sn}/^{116}\text{Sn}$ , and  $^{124}\text{Sn}/^{116}\text{Sn}$  versus  $^{122}\text{Sn}/^{118}\text{Sn}$  for the cassiterites analyzed by solution nebulization method in different sessions with experimentally determined regression (grey area).

**Table S1.**  $\delta^{122/118}\text{Sn}_{3161a}$  values for the decomposition experiments with various methods during the initial exploration stage.

| sample | reagent                                                                  | temperature | tool       | time (h) | yield (%) |
|--------|--------------------------------------------------------------------------|-------------|------------|----------|-----------|
| T1     | 9 mL HCl                                                                 | 200 °C      | microwave  | 5        | 0.14      |
| T2     | 8.5 mL HCl + 0.01115 g $\text{NH}_2\text{OH}\cdot\text{HCl}$ + 0.5 mL HF | 220 °C      | microwave  | 5        | 0.48      |
| T3     | 9 mL HCl + 0.01237 g $\text{NH}_2\text{OH}\cdot\text{HCl}$               | 220 °C      | microwave  | 5        | 1.08      |
| T4     | 8 mL HCl + 0.1 g $\text{NH}_2\text{OH}\cdot\text{HCl}$                   | 200 °C      | microwave  | 5        | 1.47      |
| T5     | 9 mL HCl + 0.0442 g $\text{NH}_2\text{OH}\cdot\text{HCl}$                | 220 °C      | microwave  | 5        | 1.50      |
| T6     | 9 mL HCl + 0.03707 g $\text{NH}_2\text{OH}\cdot\text{HCl}$               | 220 °C      | microwave  | 5        | 1.58      |
| T7     | 9 mL HCl + 0.0541 g $\text{NH}_2\text{OH}\cdot\text{HCl}$                | 220 °C      | microwave  | 5        | 1.63      |
| T8     | 0.15 mL $\text{HClO}_4$ + 3mL HCl + 0.5 mL HF                            | 200 °C      | Parr bombs | 48       | 2.29      |
| T9     | 0.1 mL $\text{HClO}_4$ + 0.8 mL HF + 0.2 mL $\text{HNO}_3$               | 200 °C      | Parr bombs | 48       | 2.55      |
| T10    | 0.1 mL $\text{HClO}_4$ + 1 mL HCl                                        | 200 °C      | Parr bombs | 48       | 3.09      |
| T10    | 0.2 mL $\text{HClO}_4$ + 2 mL HCl                                        | 200 °C      | Parr bombs | 48       | 13.44     |
| T12    | 5 mL HCl                                                                 | 200 °C      | Parr bombs | 48       | 31.96     |
| T13    | 3.5 mL HCl + 0.01030 g $\text{NH}_2\text{OH}\cdot\text{HCl}$             | 200 °C      | Parr bombs | 48       | 37.20     |

**Table S2.**  $\delta^{122/118}\text{Sn}_{3161a}$  values for the decomposition experiments with the high-pressure bomb.

| Experiments | sample      | time (h) | yield (%) | $\delta^{122/118}\text{Sn}$ | 2sd   |
|-------------|-------------|----------|-----------|-----------------------------|-------|
| <b>EP A</b> | b03         | 32       | 39.19     | 0.15                        | 0.10  |
|             | b04         | 65       | 18.62     | -0.02                       | 0.10  |
|             | b05         | 89       | 54.70     | 0.22                        | 0.01  |
|             | b07         | 89       | 60.10     | 0.27                        | 0.05  |
|             | b11         | 108      | 29.51     | 0.14                        | 0.01  |
|             | b13         | 131      | 54.63     | 0.20                        | 0.03  |
|             | b14         | 131      | 54.32     | 0.22                        | 0.02  |
|             | b16         | 166      | 39.01     | 0.13                        | 0.09  |
|             | b21         | 166      | 48.30     | 0.26                        | 0.08  |
|             | b20         | 186      | 63.01     | 0.28                        | 0.08  |
|             | b22         | 186      | 60.35     | 0.27                        | 0.01  |
|             | b24         | 218      | 47.93     | 0.19                        | 0.04  |
|             | <b>EP B</b> | B20      | 72        | 13.43                       | -0.13 |
| B25         |             | 96       | 44.30     | 0.16                        | 0.06  |
| B24         |             | 120      | 55.62     | 0.20                        | 0.02  |
| B07         |             | 144      | 26.29     | 0.07                        | 0.04  |
| B03         |             | 192      | 58.51     | 0.17                        | 0.02  |
| B14         |             | 240      | 53.50     | 0.21                        | 0.10  |
| <b>EP C</b> | YT04-1      | 480      | 79.63     | 0.28                        | 0.03  |
|             | YT41-1      | 480      | 100.00    | 0.27                        | 0.03  |
|             | YT120-1     | 480      | 100.00    | 0.29                        | 0.00  |
|             | YT130-1     | 480      | 96.21     | 0.28                        | 0.04  |
|             | YT 41-2     | 480      | 100.00    | 0.28                        | 0.04  |
|             | DK92        | 480      | 100.00    | 0.30                        | 0.02  |
